# Supplementary material for: Can satellite altimetry observe coastally trapped waves on sub-monthly timescales?
Source: Copernicus journal article supplement (doi:10.5194/egusphere-2025-809), 2025-02-26
Supplement: Supplementary file [file egusphere-2025-809-AC1-supplement.pdf]

The manuscript evaluates the capacity of new altimetric products which include new satellites especially SWOT which measures sea level along 2D swath, and new processing techniques to capture Coastal trapped waves (CTWs) signal at submonthly time-scales. The author describes the methodology and applies statistical analysis ( correlations and Empirical Orthogonal function decomposition ) to assess the different products and found that the submonthly signals are overall well detected by altimetry. This manuscript presents a valuable analysis of new altimetric products for capturing CTWs. However, several aspects require further clarification and refinement. Hereafter the specific comments. I think addressing these points will strengthen the manuscript and improve its impact.

I would like to thank the reviewer for the constructive feedback. Below, I provide a point-by-point response to the comments. The revised sections in the manuscript are highlighted in red.

Note: While this review retains the naming convention used in the original submission to facilitate the review process, the new manuscript adopts the suggestion of the other reviewer by renaming the MIOST product as “MIOST<sub>SWOT+nadir</sub>”, which is the same convention used in the following, related paper:

Ballarotta, M., Ubelmann, C., Bellemin-Laponnaz, V., Le Guillou, F., Meda, G., Anadon, C., Laloue, A., Delepouille, A., Faugère, Y., Pujol, M.-I., Fablet, R., and Dibarboure, G.: Integrating wide-swath altimetry data into Level-4 multi-mission maps, *Ocean Sci.*, 21, 63–80, <https://doi.org/10.5194/os-21-63-2025>, 2025.

## Introduction

- To improve clarity, I suggest reorganizing the introduction into two distinct paragraphs: A discussion on CTWs as the primary study objective, emphasizing the importance of accurately representing CTWs and a description of the different altimetric products (MIOST with and without SWOT) to avoid repetition and potential confusion.

I have taken the reviewer’s suggestions into consideration and have reorganized the introduction so that it begins with a discussion on CTWs, followed by a discussion on satellite altimetry. While the paragraphs are distinct, I have not added separate subtitles, as this is not in line with the journal’s style. A discussion on the importance of accurately representing CTWs was already included in the conclusions, and I prefer to keep it there. The specific characteristics of the different altimetric products (MIOST with and without SWOT) are addressed in the Data section, where I believe they are most appropriately placed. I believe this new structure of the introduction helps avoid repetition and improves clarity.

- Additionally, it would be helpful to include an outline of the paper at the end of the introduction.

An outline has been added

## Data

Tide Gauges : How many tide gauges were excluded?

There were 11 records in the selected region. 3 were excluded to ensure a minimum distance of 50 km between the records. A further 3 were excluded to avoid the proximity of river mouths.

Altimetry :

Introducing the different products at the beginning and specifying their names would improve clarity.

We have applied this suggestion in the new version

Lines 82–85: Does the inclusion of SWOT in the MIOST product significantly affect the dataset compared to DT2024 in the study region during the scientific phase?

Specifically, does it affect spatial patterns ? To address this in the results, it would be helpful to add snapshots of a CTW event.

Combining this suggestion with similar ones later in the review, we have added and commented a new figure showing the snapshots of a CTW event as seen in the CEOF reconstruction based on the different dataset

## Methods

Section 3.2 : This paragraph may not be necessary, as the method is well-known.

Section 3.3 : This section may also be unnecessary.

I agree with the reviewer that the methods are well known to many readers. However, this may not be the case for everyone. For instance, the second reviewer appears to be less familiar with the Radon transform, which is an image processing technique. Therefore, I would prefer to retain the two paragraphs to enhance clarity and ensure replicability.

## Results and Discussion

Time series : I think that conducting a spectral analysis of the unfiltered time series would be useful to quantitatively compare the different products and support the affirmation in line 145-146. Figure 2 and 3 could be also combined.

This is a very good suggestion, I have added the spectral analysis and matched the latter with Figure 3. For this reason, in order not to overload a single Figure, I have left

Figure 2 untouched. The corresponding description of the findings concerning periods and amplitudes has also been amended.

Correlations ( Figure 4) :

- Are the correlations shown statistically significant, particularly offshore? Some correlation values on the shelf appear to be of the same magnitude as those offshore. Applying a mask could help focus on shelf values.

In the new version, a mask using black diagonal stripes is applied to all figures showing correlation within the domain, including those in the appendix, to mark non-statistically significant correlations.

- Could the lag provide an estimated CTW period? Is this period consistent with those observed in the Hovmöller diagrams?

In the new version, the period of the CTW is analyzed using two newly implemented strategies suggested by the reviewer: the complex empirical orthogonal function (CEOF) and the fast Fourier transform (FFT). In my opinion, these methods provide sufficient redundancy.

- Additionally, the continuous colorbar makes it difficult to discern correlation values.

I now use a discrete colorbar

Section 4.3 :

- Can you indicate the track used for the Hovmöller diagram in Figure 1 for more clarity. Does selecting a more offshore track affect CMES and MIOST results (Line 189)?

The Hovmöller diagram is computed along the coastline, therefore a track on Figure 1 would simply correspond to the coastline inside the parallelogram. To be clearer, I reformulated the caption of the Hovmöller diagram in this way: “Each column represents the sea level anomaly time series at a coastal location within the parallelogram shown in Figure 1, progressing from the southwesternmost point northward along the coast.”

The strongest signal of a coastal trapped wave is typically found near the coast and weakens with increasing distance offshore. However, in order to be able to fully answer to the reviewer, I have also computed the Hovmöller diagram using a coastal track shifted  $0.2^\circ$  eastward in longitude (as explained below, this track is used to define the locations). A slightly weaker signal is observed. MIOST still shows better agreement with BLUELINK than CMEMS, although the phase speed differs more than in the coastal case. Shifting offshore is indeed suboptimal for altimetry, as the influence of off-shelf measurements increases in the optimal interpolation process.

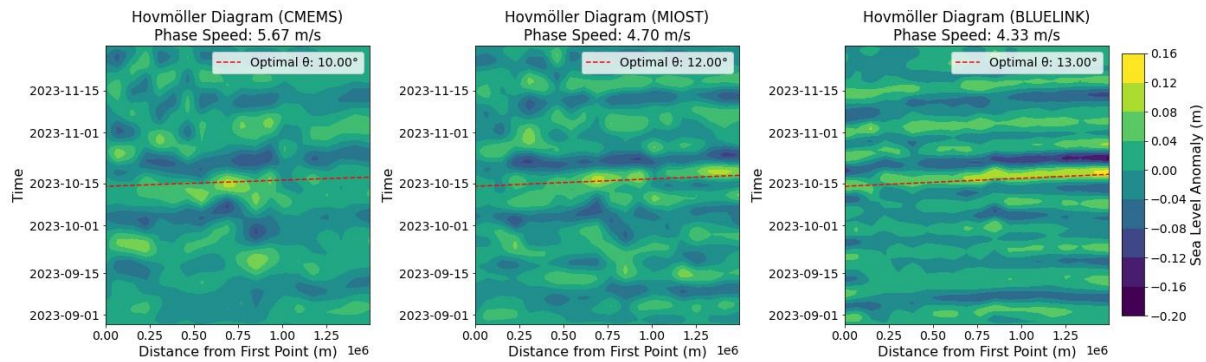

- Lines 186–187 : that can be move to the figure caption.

Done

Phase Speed Computation :

- The computed phase speed appears to be underestimated since the dashed line does not cross SLA maxima for BLUELINK, and the maxima are difficult to identify in CMES data. I was wondering how does the Radon transform method compute phase speed in the absence of a clear propagation pattern?

Please see the answer to the next point

- Is the phase speed computed only for the first propagation, and does it remain consistent with subsequent propagations? For example, the CTWs propagating between 10/15/2023 and 11/01/2023 seem better captured by MIOST and CMES. Do these waves share the same phase speed?

There are few points to be clarified. First of all, the phase speed is not computed only for the first propagation: The Radon transform identifies all dominant linear features in a Hovmöller diagram, not just one. It reflects the combined effect of multiple propagating signals, rather than isolating a single phase speed.

Secondly, the Radon transform works by integrating values along lines at various angles (which correspond to different phase speeds). A stronger signal (such as the strongest CTW event identified by the reviewer) will contribute more intensity to the integral along the line that matches its slope. To highlight this, I have shifted the dotted line to match the strongest CTW event in the plot.

Thirdly, there is no absence of clear propagation pattern in our dataset, but rather higher or lower signal-to-noise ratio. This is demonstrated by the confidence intervals that can be computed as a result of the application of the Radon transform. This score is a form of normalized sharpness and gives an indication of how much the peak stands out from the noise in terms of standard deviations. A signal-to-noise ratio greater than 2 often suggests a significant signal, as it means the peak is more than 2 standard deviations above the mean, implying that the signal is quite distinct from the noise. In

this case, the BLUELINK and MIOST are above 2, respectively 2.87 and 2.29. The confidence score for CMEMS is 1.76, which confirms the results presented in the manuscript.

To support these statements, I show below the normalized sum of squares from the Radon transform (see Equation 4). A clear propagation pattern is visible in all three datasets, as indicated by a distinct dominant peak in each case. The differences in signal to noise ratio are reflected in how sharp the dominant peak is compared to nearby values, which represent other possible propagation angles, and by the presence of a smaller peak around 110 degrees in the two altimetry datasets.

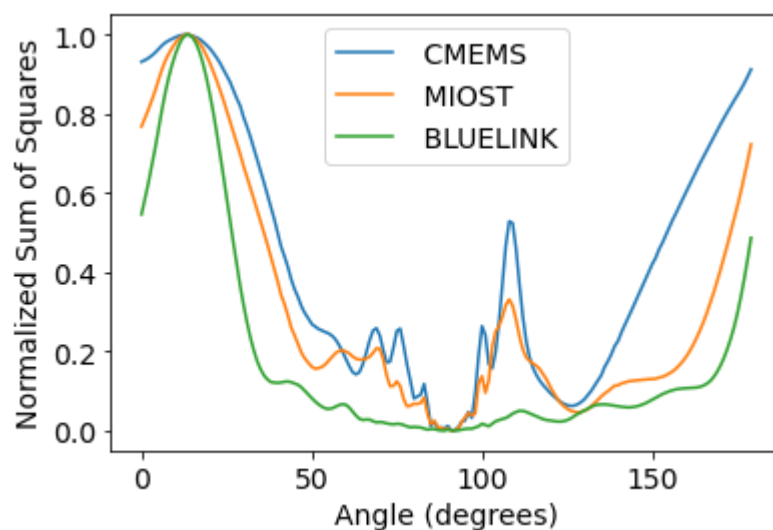

- I suggest to compute SLA lagged correlations along the track from a reference point (e.g., Bermagui) . Then, estimate phase speed using a distance vs. lagged correlation plot.

I understand that this is an alternative method for estimating phase speed. However, based on the explanations I provided in the previous response regarding the Radon transform, I do not see the benefit of applying this alternative. As Almar et al. (2014) state: 'The accuracy [of the Radon transform in estimating wave speed] is fairly insensitive to wave characteristics, whereas the main limitations arise from the sampling scheme, specifically the number and density of wave gauges.' The use of lagged correlations to estimate phase speed would be appropriate if I were working with sparsely distributed tide gauge data. This is not the case here, as I am using a regularly spaced dense datasets.

Almar, R., Michallet, H., Cienfuegos, R., Bonneton, P., Tissier, M. and Ruessink, G., 2014. On the use of the Radon Transform in studying nearshore wave dynamics. *Coastal Engineering*, 92, pp.24-30. <https://doi.org/10.1016/j.coastaleng.2014.06.008>

#### EOF Analyses:

- Using EOFs to study CTWs might introduce biases, as the same propagation pattern could be projected onto different modes of variability. To better capture propagative patterns, consider using complex EOFs.

Thank you for this very useful suggestion. CEOF is now applied (on offshore masked maps as suggested later) and it helped indeed to improve, for example capturing more variance in the altimetry dataset. Methodology and results have been updated accordingly in the new manuscript.

- How does the other EOFs modes appear?

The second CEOF mode accounts for 9%, 13%, and 20% of the variance in BLUELINK, MIOST, and CMEMS, respectively. Below, I present its representation in terms of reconstructed signal, amplitude, and phase. It can be observed that this mode consists of oscillations similar to those of the primary CEOF, particularly in terms of period, but with lower amplitudes and a less distinct, noisier phase pattern. I suspect that a significant portion of the detected signal may be attributable to noise; however, lacking a solid scientific basis to support this claim, I have chosen not to include this discussion in the main manuscript.

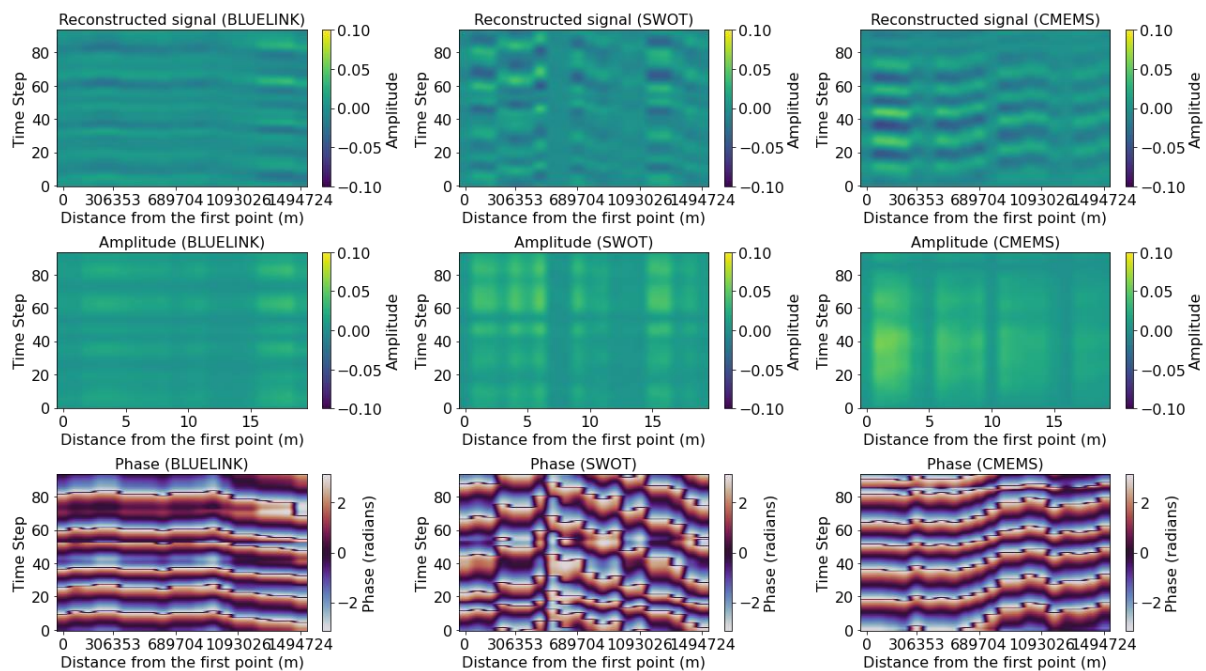

- Consider presenting EOFs results in a "Hovmöller aesthetic," with distance on the x-axis, days on the y-axis, and EOF amplitude in color. This could help reduce figure size and enhance clarity.

In the new version, CEOFs results are presented in a "Hovmöller aesthetic" in the new Figure 6

- Merging Figures 6 and 7 may also be beneficial.

The figures related to the EOF analyses have completely changed to match the suggestions reported by the reviewer.

CTW characterizations:

I think the paper lacks a clear description of the CTWs observed in terms of period and spatial patterns. You could apply a complex EOF analysis on offshore-masked maps to estimate wave wavelengths and phase. Or Adding snapshots would illustrate how different products reproduce spatial patterns associated with CTWs.

Thank you for these suggestions. I applied all of them. Thanks to the application of the CEOF I have reported the spatial and temporal phase along the coast (Figure 7, lower panels) and the estimation of the dominant wavelength and period of the main CEOF. The snapshots of both the original filtered signal and the reconstructed signal from the first CEOF coinciding with the strongest CTW event are now added in Figure 7 and C1. The discussion has been updated accordingly.
